# Supplementary material for: Preharvest Gibberellic Acid Treatment Increases Both Modulus of Elasticity and Resistance in Sweet Cherry Fruit (cv. ‘Bing’ and ‘Lapins’) at Harvest and Postharvest During Storage at 0 °C
Source: MDPI journal article supplement (doi:10.3390/agronomy14112738), 2024-11-20
Supplement: s1 [file s1]

# Supplementary Materials:

**Table S1.** Effect of gibberellic acid (GA) treatments on induced mechanical damage (fruit damage index) by compression and impact tests on 'Bing' and 'Lapins' sweet cherry cultivars. Treatments: T0 (control), 0 ppm GA and GA3 average of T30, 15+15 ppm GA (pit-hardening + straw-colour); T45, 25+20 ppm GA (pit-hardening + straw-colour) and T60, 30+30 ppm GA (pit-hardening + straw-colour).

|        |            | Treatment       | Compression test | Impact test |
|--------|------------|-----------------|------------------|-------------|
| Bing   | Colour 3   | T0              | 3.63             | 0.93 a      |
|        |            | GA3             | 3.52             | 1.62 b      |
|        |            | <i>p</i> -value | NS               | 0.0245      |
|        | Colour 3.5 | T0              | 2.13             | 1.10        |
|        |            | GA3             | 2.13             | 0.91        |
|        |            | <i>p</i> -value | NS               | NS          |
| Lapins | Colour 3   | T0              | 3.93             | 1.40        |
|        |            | GA3             | 3.68             | 1.38        |
|        |            | <i>p</i> -value | NS               | NS          |
|        | Colour 3.5 | T0              | 2.40             | 1.35        |
|        |            | GA3             | 2.83             | 1.20        |
|        |            | <i>p</i> -value | NS               | NS          |

Each fruit was evaluated on an arbitrary 5-point scale where 0 = no pitting, 1 = mild pitting, 2 = moderate pitting, 3 = severe pitting and 4 = very severe pitting.

Different letters for each cultivar and colour show significantly different mean values for Fisher's LSD test, with *p*-value < 0.05. NS: non-significant at *p*-value < 0.05.
